# Supplementary material for: Meeting the challenges posed by per diem in development projects in southern countries: a scoping review
Source: Springer Nature journal article supplement (doi:10.1186/s12992-020-00571-6), 2020-05-28
Supplement: MOESM2 [file 18026554]

**Additional file 2.** Governmental and non-governmental agencies and organizations of which a report or article written by an employee (current or former) is present or cited in the results

- African Development Bank
- Chr. Michelsen Institute (CMI)
- Communauté de l'Afrique de l'Est (East African Community)
- Inter Aide Malawi
- Groupe de coordination générale des partenaires techniques et financiers au Sénégal (G50).
- Norad (Norwegian Agency for Development Cooperation)
- République du Mali
- Scotland Malawi Partnership
